# Supplementary material for: New catalysts for carboxylation of propylene glycol to propylene carbonate via high-throughput screening
Source: Royal Society of Chemistry journal article supplement (doi:10.1039/c5fd00061k), 2015-01-01
Supplement: c5fd00061k1.pdf [file c5fd00061k1.pdf]

## Supplementary Material for

### New catalysts for carboxylation of propylene glycol to propylene carbonate via high-throughput screening

José A. Castro-Osma,<sup>a</sup> James W. Comerford,<sup>a</sup> Richard H. Heyn,<sup>\*,b</sup> Michael North<sup>a</sup> and Elisabeth Tangstad<sup>b</sup>

<sup>a</sup>University of York, Department of Chemistry, Green Chemistry Center of Excellence, York YO10 5DD, North Yorkshire, England.

<sup>b</sup>SINTEF Materials and Chemistry, P. O. Box 124 Blindern, 0314 Oslo, Norway. E-mail: [rh@sindef.no](mailto:rh@sindef.no)

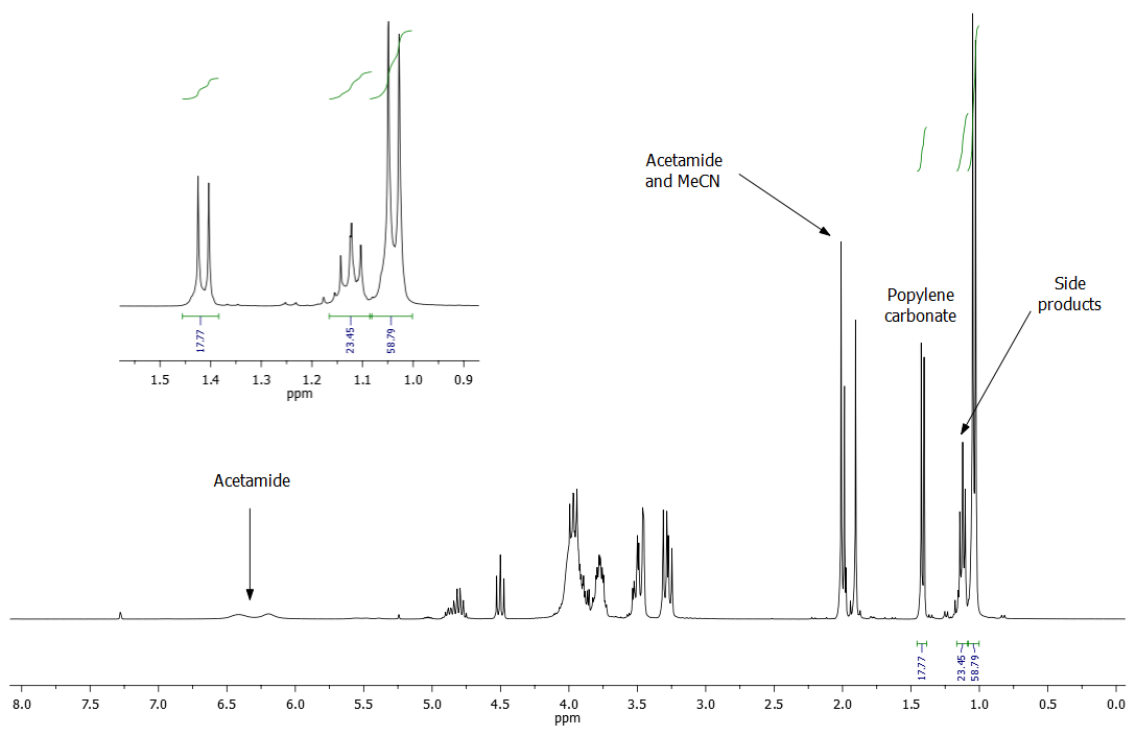

**Figure S1.**  $^1\text{H}$  NMR spectrum of a PG to PC reaction mixture showing side product formation.

**Table S1.** List of all new catalyst formulations tested in the high throughput screening experiments.

|                                                       |                                                |                                                       |
|-------------------------------------------------------|------------------------------------------------|-------------------------------------------------------|
| Zn(OAc) <sub>2</sub> + p-CBSA; 10 mol %               | ZnI <sub>2</sub> + p-CBSA                      | Cu(OAc) <sub>2</sub> + p-TSA                          |
| Zn(OAc) <sub>2</sub> + p-TSA; 10 mol %                | ZnI <sub>2</sub> + p-TSA                       | Cu(acac) <sub>2</sub>                                 |
| Zn(OAc) <sub>2</sub> + 10 mol % p-CBSA                | Zn(F <sub>6</sub> -acac) <sub>2</sub>          | Cu(acac) <sub>2</sub> + p-CBSA                        |
| Zn(OAc) <sub>2</sub> + KI                             | Zn(F <sub>6</sub> -acac) <sub>2</sub> + p-CBSA | Cu(acac) <sub>2</sub> + p-TSA                         |
| Zn(OAc) <sub>2</sub> + p-CBSA + KI                    | Zn(acac) <sub>2</sub> + p-CBSA                 | Cu(OTf) <sub>2</sub>                                  |
| Zn(OAc) <sub>2</sub> + NEt <sub>4</sub> Br            | Zn(TFA) <sub>2</sub>                           | Cu(OTf) <sub>2</sub> + p-CBSA                         |
| Zn(OAc) <sub>2</sub> + p-CBSA + NEt <sub>4</sub> Br   | Zn(TFA) <sub>2</sub> + p-CBSA                  | Zn(OTf) <sub>2</sub>                                  |
| Zn(OAc) <sub>2</sub> + KOH                            | ZnSO <sub>4</sub>                              | Zn(OTf) <sub>2</sub> + p-CBSA                         |
| Zn(OAc) <sub>2</sub> + K <sub>2</sub> CO <sub>3</sub> | ZnSO <sub>4</sub> + p-CBSA                     | Zn(OTf) <sub>2</sub> + p-TSA                          |
| Zn(OAc) <sub>2</sub> + DBSI                           | Zn(BF <sub>4</sub> ) <sub>2</sub>              | Zn(OTf) <sub>2</sub> + DBSI                           |
| Zn(OAc) <sub>2</sub> + p-NBSA                         | Zn(BF <sub>4</sub> ) <sub>2</sub> + p-CBSA     | Zn(OTf) <sub>2</sub> + p-NBSA                         |
| Zn(OAc) <sub>2</sub> + bipy                           | Fe(OTf) <sub>3</sub>                           | Zn(Tos) <sub>2</sub>                                  |
| Zn(OAc) <sub>2</sub> + p-CBSA + bipy                  | Fe(OTf) <sub>3</sub> + p-CBSA                  | Zn(Tos) <sub>2</sub> + p-CBSA                         |
| Zn(OAc) <sub>2</sub> + p-TSA + bipy                   | Co(OAc) <sub>2</sub> + p-CBSA                  | Zn(Tos) <sub>2</sub> + p-TSA                          |
| Zn(OAc) <sub>2</sub> + Li(OTf)                        | CoCO <sub>3</sub>                              | Zn(Tos) <sub>2</sub> + DBSI                           |
| Zn(OAc) <sub>2</sub> + Mg(OTf) <sub>2</sub>           | CoCO <sub>3</sub> + p-CBSA                     | Zn(Tos) <sub>2</sub> + p-NBSA                         |
| Zn(OAc) <sub>2</sub> + Ca(OTf) <sub>2</sub>           | (dppe)NiCl <sub>2</sub>                        | Zn(Tos) <sub>2</sub> + KOH                            |
| Zn(OAc) <sub>2</sub> + Al(OTf) <sub>3</sub>           | Ni(OAc) <sub>2</sub> + p-CBSA                  | Zn(Tos) <sub>2</sub> + K <sub>2</sub> CO <sub>3</sub> |
| Zn(OAc) <sub>2</sub> + Sc(OTf) <sub>3</sub>           | Ni(OAc) <sub>2</sub> + p-TSA                   | LiOTf                                                 |
| Zn(OAc) <sub>2</sub> + Y(OTf) <sub>3</sub>            | NiBr <sub>2</sub>                              | Mg(OTf) <sub>2</sub>                                  |
| Zn(OAc) <sub>2</sub> + La(OTf) <sub>3</sub>           | NiBr <sub>2</sub> + CBSA                       | Ca(OTf) <sub>2</sub>                                  |
| Zn(OAc) <sub>2</sub> + Sm(OTf) <sub>3</sub>           | NiBr <sub>2</sub> + p-TSA                      | Al(OTf) <sub>3</sub>                                  |
| Zn(OAc) <sub>2</sub> + Yb(OTf) <sub>3</sub>           | Ni(OTf) <sub>2</sub>                           | Sc(OTf) <sub>3</sub>                                  |
| ZnCl <sub>2</sub> + p-CBSA                            | Ni(OTf) <sub>2</sub> + p-CBSA                  | Y(OTf) <sub>3</sub>                                   |
| ZnCl <sub>2</sub> + p-TSA                             | Pd(OAc) <sub>2</sub>                           | La(OTf) <sub>3</sub>                                  |
| ZnBr <sub>2</sub> + p-CBSA                            | Pd(OAc) <sub>2</sub> + p-CBSA                  | Yb(OTf) <sub>3</sub>                                  |
| ZnBr <sub>2</sub> + p-TSA                             | Cu(OAc) <sub>2</sub> + p-CBSA                  | Sm(OTf) <sub>3</sub>                                  |

All compounds added at the 5 mol % level (with respect to propylene glycol), unless otherwise indicated. Abbreviations: p-CBSA, p-chlorobenzenesulfonic acid; p-TSA, p-toluenesulfonic acid; DBSI, dibenzenesulfonimide; p-NBSA, p-nitrobenzenesulfonic acid; bipy, 2,2'-bipyridine; OTf, trifluoromethanesulfonate; F<sub>6</sub>-acac, hexafluoroacetylacetonate; acac, acetylacetonate; TFA, trifluoroacetate; dppe, 1,2-(diphenylphosphino)ethane; Tos, p-toluenesulfonate;

All materials were anhydrous apart from the following compounds: p-toluenesulfonic acid hydrate, 4-nitrobenzenesulfonic acid hydrate, copper acetate monohydrate, nickel acetate tetrahydrate, cobalt carbonate hydrate, cobalt acetate tetrahydrate, zinc tetraborate hydrate, zinc trifluoroacetate hydrate, zinc p-toluenesulfonate hydrate, zinc hexafluoroacetylacetonate dihydrate, zinc sulfate monohydrate, zinc acetylacetonate hydrate and yttrium trifluoromethanesulfonate hydrate.
